# Supplementary material for: Novel homogeneous selective electrocatalysts for CO2reduction: an electrochemical and computational study of cyclopentadienyl-phenylendiamino-cobalt complexes
Source: Royal Society of Chemistry journal article supplement (doi:10.1039/d0se00790k), 2020-01-01
Supplement: d0se00790k1.pdf [file d0se00790k1.pdf]

## Supporting information

### **Novel homogeneous selective electrocatalysts for CO<sub>2</sub> reduction: an electrochemical and computational study of cyclopentadienyl-phenyldiamino-cobalt complexes.**

*Nicola Melis†, Francesca Mocci ‡, Annalisa Vacca† and Luca Pilia†\**

† Dipartimento di Ingegneria Meccanica Chimica e dei Materiali, Università di Cagliari, via Marengo 2, I09123, Cagliari, Italy

‡ Dipartimento di Scienze Chimiche e Geologiche, Università di Cagliari, S.S. 554 Km 4,500, I09042 Monserrato, Italy

\* E-mail: [pilialuc@unica.it](mailto:pilialuc@unica.it)

## Contents

|                                                                                                                                                                                                                                |           |
|--------------------------------------------------------------------------------------------------------------------------------------------------------------------------------------------------------------------------------|-----------|
| <b>Synthesis</b> .....                                                                                                                                                                                                         | <b>S3</b> |
| <b>Figure S1.</b> Graph I vs $(v)^{0.5}$ of oxidation and reduction processes of complex <b>I</b> and specifics of the corresponding linear fits. ....                                                                         | <b>S3</b> |
| <b>Figure S2.</b> Graph I vs $(v)^{0.5}$ of oxidation and reduction processes of complex <b>II</b> and specifics of the corresponding linear fits. ....                                                                        | <b>S3</b> |
| <b>Figure S3.</b> Graph I vs $(v)^{0.5}$ of oxidation and reduction processes of complex <b>III</b> and specifics of the corresponding linear fits. ....                                                                       | <b>S4</b> |
| <b>Figure S4.</b> Frontier orbitals of the complexes <b>I-IV</b> with the corresponding energies.....                                                                                                                          | <b>S4</b> |
| <b>Figure S5.</b> Specifics for the linear fit on Figure 3.....                                                                                                                                                                | <b>S4</b> |
| <b>Figure S6.</b> ADCH partial charge on different moieties of the anionic form of the complexes. Blue: carbon atoms of the benzene; Green: Cobalt atom; Orange: carbon atoms of cyclopentadienyl; Yellow: N-Co-N moiety. .... | <b>S5</b> |
| <b>Table S1.</b> Calculated enhancements ( $I_{cat}/I_p$ ) at increasing amount of water. ....                                                                                                                                 | <b>S5</b> |
| <b>Table S2.</b> Calculated TOF value using equation (4) at increasing amount of water for complexes <b>I-IV</b> . .                                                                                                           | <b>S6</b> |
| <b>Table S3.</b> PCM//6-311++G(d,p) enthalpies of the neutral and anionic form of compounds <b>I-IV</b> .....                                                                                                                  | <b>S6</b> |
| <b>Figure S7.</b> PCM(CH <sub>3</sub> CN) B3LYP 6-311++g(d,p) optimized geometries of the two minima of compounds <b>IV</b> in the neutral form. ....                                                                          | <b>S7</b> |
| <b>Table S4.</b> FMO energies for neutral and anionic (reduced) complexes <b>I-IV</b> .....                                                                                                                                    | <b>S7</b> |
| <b>Scheme S1.</b> Reaction scheme for a ECEC mechanism .....                                                                                                                                                                   | <b>S8</b> |

## Synthesis

Complex **IV** – [CpCo(*p*-carboxy-bqdi)] – To a suspension of 0.8 g (2 mmol) of the precursor  $C_5H_5Co(CO)_2$  in 30 mL of diethyl ether is added portionwise 0.34 g (2 mmol) of *p*-carboxyphenylendiamine and the reaction mixture was stirred at room temperature for 1 xh. The purplish red mixture is therefore dropwise added of 0.4 g (0.56 mL, 4 mmol) of  $Et_3N$  in 10 mL of diethylether and vigorously stirred for 1.5 h and the formation of a dark precipitate is observed. A first portion of the solid is separated by centrifugation and another portion after slow evaporation of the mother liquor. The precipitate is then washed with hexane and diethyl ether to yield a dark purple bronze solid (340 mg, 66%). **IR** (ATR)  $cm^{-1}$ : 3327 (br), 3112, 1555, 1525, 1373, 1282, 1207, 1106, 1053, 1003, 780.

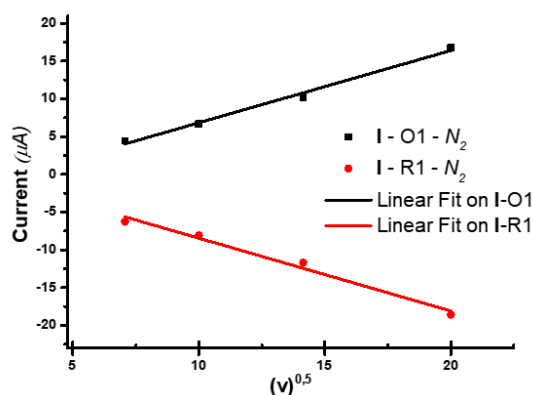

| Equation                | y = a + b*x  |          |                |
|-------------------------|--------------|----------|----------------|
| Weight                  | No Weighting |          |                |
| Residual Sum of Squares | 0,68413      | 1,39105  |                |
| Pearson's r             | 0,99606      | -0,99217 |                |
| Adj. R-Square           | 0,98822      | 0,97659  |                |
|                         |              | Value    | Standard Error |
| <b>I-O1 (N2)</b>        | Intercept    | -2,73298 | 0,8247         |
|                         | Slope        | 0,95719  | 0,06023        |
| <b>I-R1 (N2)</b>        | Intercept    | 1,20459  | 1,17597        |
|                         | Slope        | -0,9646  | 0,08588        |

**Figure S1.** Graph  $I$  vs  $(v)^{0.5}$  of oxidation and reduction processes of complex **I** and specifics of the corresponding linear fits.

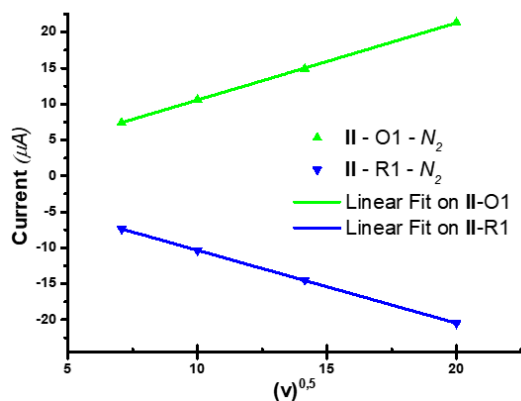

| Equation                | y = a + b*x  |          |                |
|-------------------------|--------------|----------|----------------|
| Weight                  | No Weighting |          |                |
| Residual Sum of Squares | 0,01021      | 0,0059   |                |
| Pearson's r             | 0,99995      | -0,99997 |                |
| Adj. R-Square           | 0,99986      | 0,99991  |                |
|                         |              | Value    | Standard Error |
| <b>II-O1 (N2)</b>       | Intercept    | -0,16717 | 0,10077        |
|                         | Slope        | 1,07326  | 0,00736        |
| <b>II-R1 (N2)</b>       | Intercept    | -0,18844 | 0,07659        |
|                         | Slope        | -1,01483 | 0,00559        |

**Figure S2.** Graph  $I$  vs  $(v)^{0.5}$  of oxidation and reduction processes of complex **II** and specifics of the corresponding linear fits.

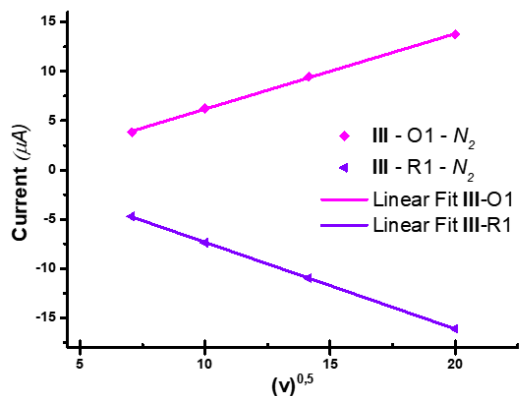

| Equation                | y = a + b*x  |                |         |
|-------------------------|--------------|----------------|---------|
| Weight                  | No Weighting |                |         |
| Residual Sum of Squares | 0,032        | 0,00435        |         |
| Pearson's r             | 0,99971      | -0,99997       |         |
| Adj. R-Square           | 0,99913      | 0,99991        |         |
|                         | Value        | Standard Error |         |
| III-O1 (N2)             | Intercept    | -1,47554       | 0,17835 |
|                         | Slope        | 0,76515        | 0,01303 |
| III-R1 (N2)             | Intercept    | 1,46145        | 0,06577 |
|                         | Slope        | -0,87899       | 0,0048  |

**Figure S3.** Graph  $I$  vs  $(v)^{0.5}$  of oxidation and reduction processes of complex **III** and specifics of the corresponding linear fits.

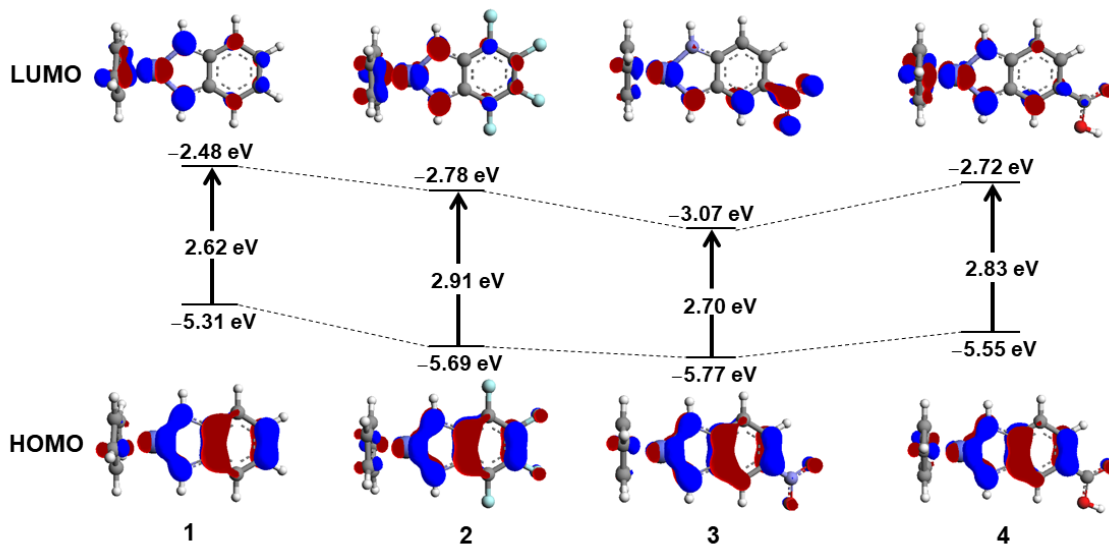

**Figure S4.** Frontier orbitals of the complexes **I-IV** with the corresponding energies.

| Equation                | y = a + b*x   |                 |         |
|-------------------------|---------------|-----------------|---------|
| Weight                  | No Weighting  |                 |         |
| Residual Sum of Squares | 1,07717E-4    |                 |         |
| Pearson's r             | 0,99895       |                 |         |
| Adj. R-Square           | <b>0,9958</b> |                 |         |
|                         | Value         | Standard Error  |         |
| E                       | Intercept     | <b>-0,50537</b> | 0,02943 |
|                         | Slope         | <b>0,70477</b>  | 0,03234 |

**Figure S5.** Specifics for the linear fit on Figure 3.

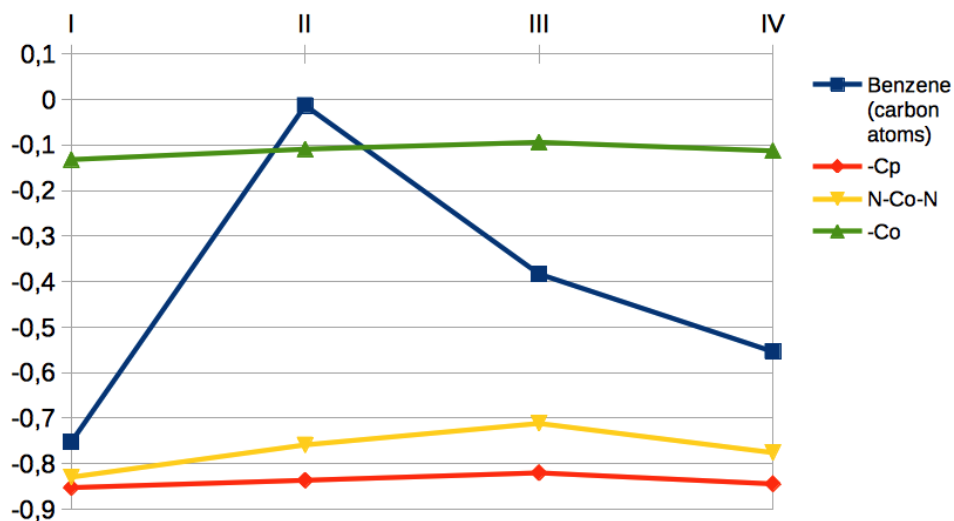

**Figure S6.** ADCH partial charge on different moieties of the anionic form of the complexes. Blue: carbon atoms of the benzene; Green: Cobalt atom; Orange: carbon atoms of cyclopentadienyl; Yellow: N-Co-N moiety.

**Table S1.** Calculated enhancements ( $I_{cat}/I_p$ ) at increasing amount of water.

|                                | E (V) | Catalytic enhancement ( $I_{cat}/I_p$ ) |                 |                 |                 |                 |                 |                |
|--------------------------------|-------|-----------------------------------------|-----------------|-----------------|-----------------|-----------------|-----------------|----------------|
|                                |       |                                         |                 |                 |                 |                 |                 |                |
| <b>I</b>                       | -2.09 | 4.12                                    | 8.24            | 17.15           | 21.20           | 22.55           | 24.40           | 1.09           |
|                                | -2.13 | 5.59                                    | 10.61           | 18.27           | 24.44           | 30.69           | 31.07           | 1.04           |
| <b>III</b>                     | -1.52 | 4.53                                    | 4.15            | 3.89            | 3.72            | 4.09            | 3.49            | 1.89           |
|                                | -2.13 | 1.11                                    | 1.61            | 2.37            | 3.656           | 3.665           | 3.25            | 0.76           |
|                                | -1.74 | 2.78                                    | 3.44            | 4.84            | 6.16            | 7.58            | 7.13            | 1.78           |
| <b>IV</b>                      | -1.91 | 3.36                                    | 5.54            | 7.80            | 9.53            | 9.53            | 9.97            | 2.49           |
|                                | -2.13 | 3.78                                    | 5.30            | 7.57            | 9.13            | 8.73            | 9.00            | 5.01           |
| <b>Water content</b><br>(%v/v) |       | 0                                       | 1.96            | 3.84            | 5.66            | 7.41            | 9.09            | 9.09           |
| <b>Atmosphere</b>              |       | CO <sub>2</sub>                         | CO <sub>2</sub> | CO <sub>2</sub> | CO <sub>2</sub> | CO <sub>2</sub> | CO <sub>2</sub> | N <sub>2</sub> |

**Table S2.** Calculated TOF value using equation (4) at increasing amount of water for complexes **I-IV**.

|                                             | <b>E (V)</b> | <b>TOF</b> |       |       |        |        |        |
|---------------------------------------------|--------------|------------|-------|-------|--------|--------|--------|
| <b>I</b>                                    | -2.09        | 3.29       | 13.17 | 57.04 | 87.16  | 98.61  | 115.46 |
| <b>II</b>                                   | -2.13        | 6.06       | 21.83 | 64.73 | 115.84 | 182.66 | 187.21 |
| <b>III</b>                                  | -1.52        | 3.98       | 3.34  | 2.93  | 2.68   | 3.24   | 2.36   |
|                                             | -2.13        | 0.24       | 0.50  | 1.09  | 2.59   | 2.60   | 2.05   |
| <b>IV</b>                                   | -1.74        | 1.49       | 2.29  | 4.54  | 7.36   | 11.14  | 9.86   |
|                                             | -1.91        | 2.19       | 5.95  | 11.80 | 17.61  | 17.61  | 19.27  |
|                                             | -2.13        | 2.77       | 5.44  | 11.11 | 16.16  | 14.78  | 15.70  |
| <b>Water content</b><br>(% <sub>v/v</sub> ) |              | 0          | 1.96  | 3.84  | 5.66   | 7.41   | 9.09   |

**Table S3.** PCM//6-311++G(d,p) enthalpies of the neutral and anionic form of compounds **I-IV**

|                               |                    | <b>Neutral</b><br>(Hartree) | <b>Anion</b><br>(Hartree) | <b>ΔH</b><br>(kcal/mol) |
|-------------------------------|--------------------|-----------------------------|---------------------------|-------------------------|
| <b>I</b>                      | DMSO               | -1918.03027                 | -1918.15493               | -0.12465                |
|                               | CH <sub>3</sub> CN | -1918.03019                 | -1918.15435               | -0.12415                |
| <b>II</b>                     | DMSO               | -2315.10720                 | -2315.24401               | -0.13681                |
|                               | CH <sub>3</sub> CN | -2315.10711                 | -2315.24352               | -0.13641                |
| <b>III</b>                    | DMSO               | -2122.60192                 | -2122.74596               | -0.14404                |
|                               | CH <sub>3</sub> CN | -2122.60176                 | -2122.74539               | -0.14364                |
| <b>IV (2a)</b> <sup>[a]</sup> | DMSO               | -2106.65811                 | -2106.79257               | -0.13446                |
|                               | CH <sub>3</sub> CN | -2106.65791                 | -2106.79190               | -0.13399                |
| <b>IV (2b)</b> <sup>[a]</sup> | DMSO               | -2106.65778                 | -2106.79274               | -0.13496                |
|                               | CH <sub>3</sub> CN | -2106.65781                 | -2106.79207               | -0.13426                |

<sup>[a]</sup> **2a** and **2b** differ for the orientation of the COOH group, as shown in figure S6

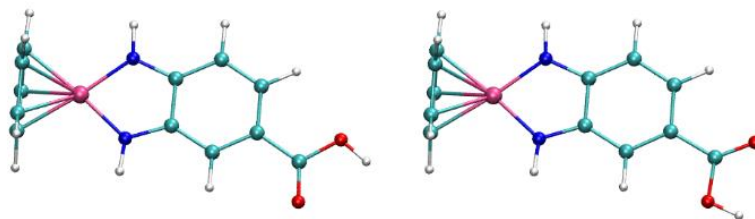

**Figure S7.** PCM(CH<sub>3</sub>CN) B3LYP 6-311++g(d,p) optimized geometries of the two minima of compounds **IV** in the neutral form.

**Table S4.** FMO energies for neutral and anionic (reduced) complexes **I-IV**.

| Complex                      | Orbital   | Energy (Hartrees) | Energy (eV) | Energy (kJ/mol) |
|------------------------------|-----------|-------------------|-------------|-----------------|
| [ <b>I</b> ] <sup>-1</sup>   | LUMO alfa | -0.01920          | -0.52246    | -50.40960       |
|                              | LUMO beta | -0.00828          | -0.22531    | -21.73914       |
|                              | HOMO alfa | -0.13275          | -3.61231    | -348.53512      |
|                              | HOMO beta | -0.15555          | -4.23273    | -408.39656      |
| [ <b>I</b> ]                 | LUMO      | -0.09100          | -2.47624    | -238.92052      |
|                              | HOMO      | -0.19527          | -5.31357    | -512.68142      |
| [ <b>II</b> ] <sup>-1</sup>  | LUMO alfa | -0.02904          | -0.79022    | -76.24453       |
|                              | LUMO beta | -0.02257          | -0.61416    | -59.25754       |
|                              | HOMO alfa | -0.14561          | -3.96225    | -382.29908      |
|                              | HOMO beta | -0.16999          | -4.62566    | -446.30878      |
| [ <b>II</b> ]                | LUMO      | -0.10211          | -2.77856    | -268.08983      |
|                              | HOMO      | -0.20902          | -5.68773    | -548.78205      |
| [ <b>III</b> ] <sup>-1</sup> | LUMO alfa | -0.19851          | -5.40174    | -521.18804      |
|                              | LUMO beta | -0.07411          | -2.01664    | -194.57582      |
|                              | HOMO alfa | -0.15344          | -4.17532    | -402.85675      |
|                              | HOMO beta | -0.17754          | -4.83111    | -466.13131      |
| [ <b>III</b> ]               | LUMO      | -0.11276          | -3.06836    | -296.05140      |
|                              | HOMO      | -0.21211          | -5.77181    | -556.89485      |
| [ <b>IV</b> ] <sup>-1</sup>  | LUMO alfa | -0.02981          | -0.81117    | -78.26616       |
|                              | LUMO beta | -0.03228          | -0.87839    | -84.75115       |

|        |           |          |          |            |
|--------|-----------|----------|----------|------------|
|        | HOMO alfa | -0.14300 | -3.89123 | -375.44653 |
|        | HOMO beta | -0.16633 | -4.52607 | -436.69945 |
| [ IV ] | LUMO      | -0.09989 | -2.71815 | -262.26122 |
|        | HOMO      | -0.20413 | -5.55466 | -535.94335 |

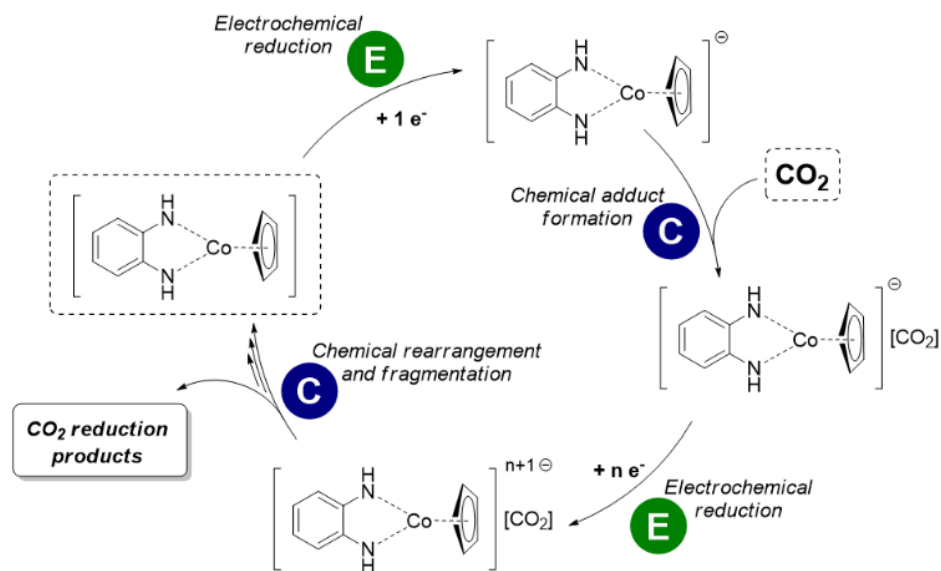

*Scheme S1. Reaction scheme for a ECEC mechanism.*
